# Supplementary material
Source: PubMed Central journal article supplement (PMC6319026)
Supplement: mmc1.pdf [file mmc1.pdf]

## **Supplemental Information**

### **IGF1 Treatment Improves Cardiac Remodeling after Infarction by Targeting Myeloid Cells**

**Andre Heinen, Rianne Nederlof, Priyadarshini Panjwani, André Spsychala, Tengis Tschaidse, Heiko Reffelt, Johannes Boy, Annika Raupach, Stefanie Gödecke, Patrick Petzsch, Karl Köhrer, Maria Grandoch, Anne Petz, Jens W. Fischer, Christina Alter, Jelena Vasilevska, Philipp Lang, and Axel Gödecke**

Figure S1

A

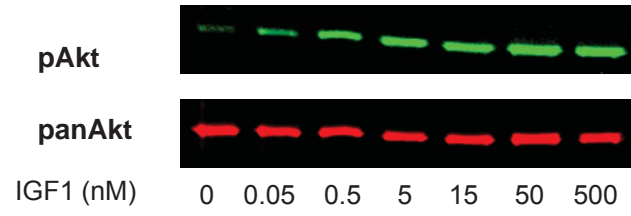

B

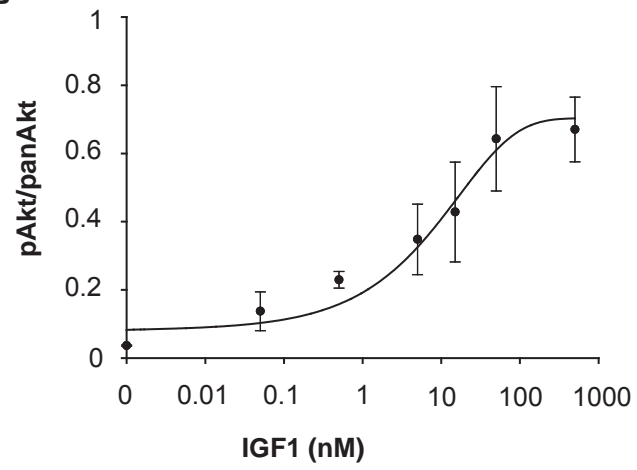

Figure S2

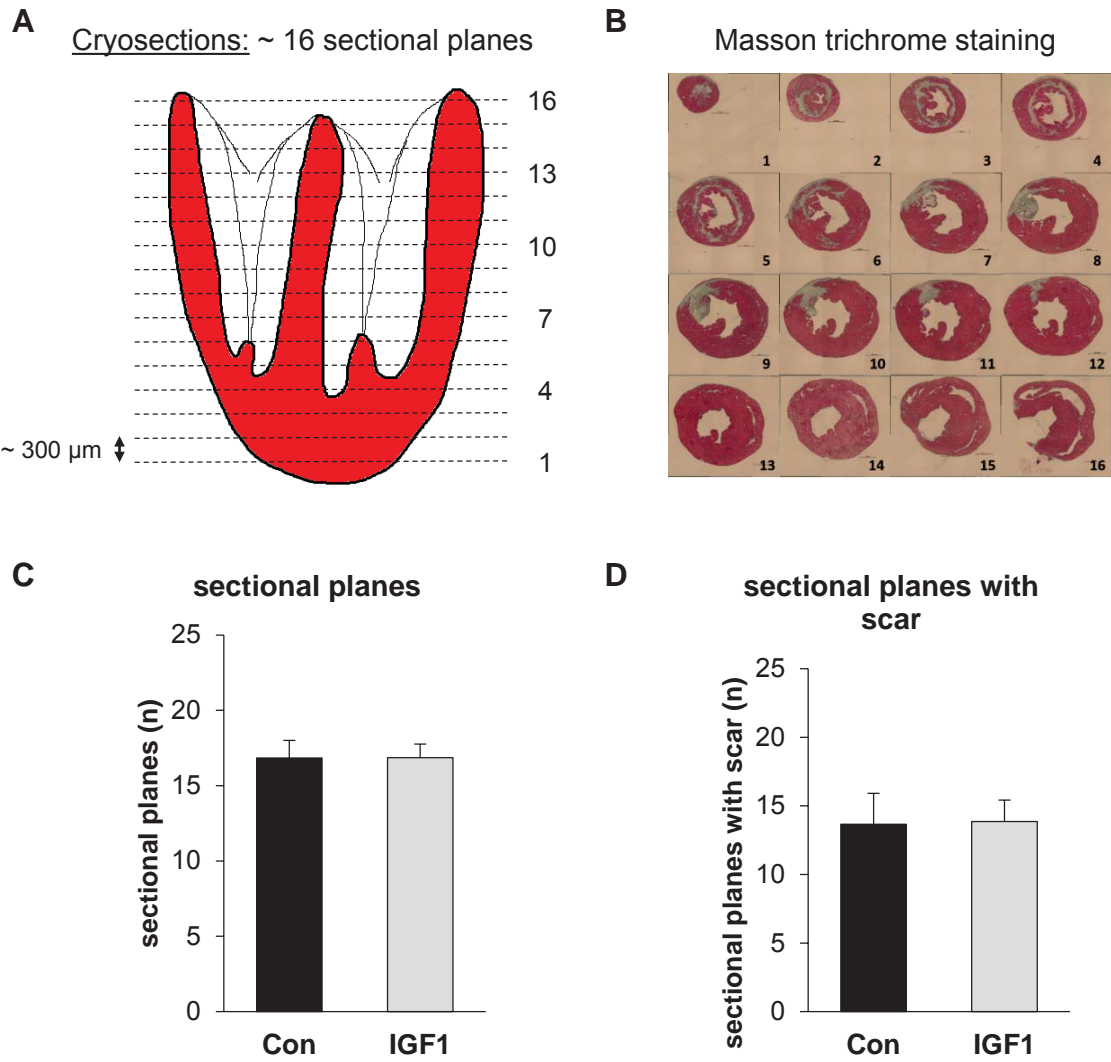

Figure S3A

Leukocyte migration day 1

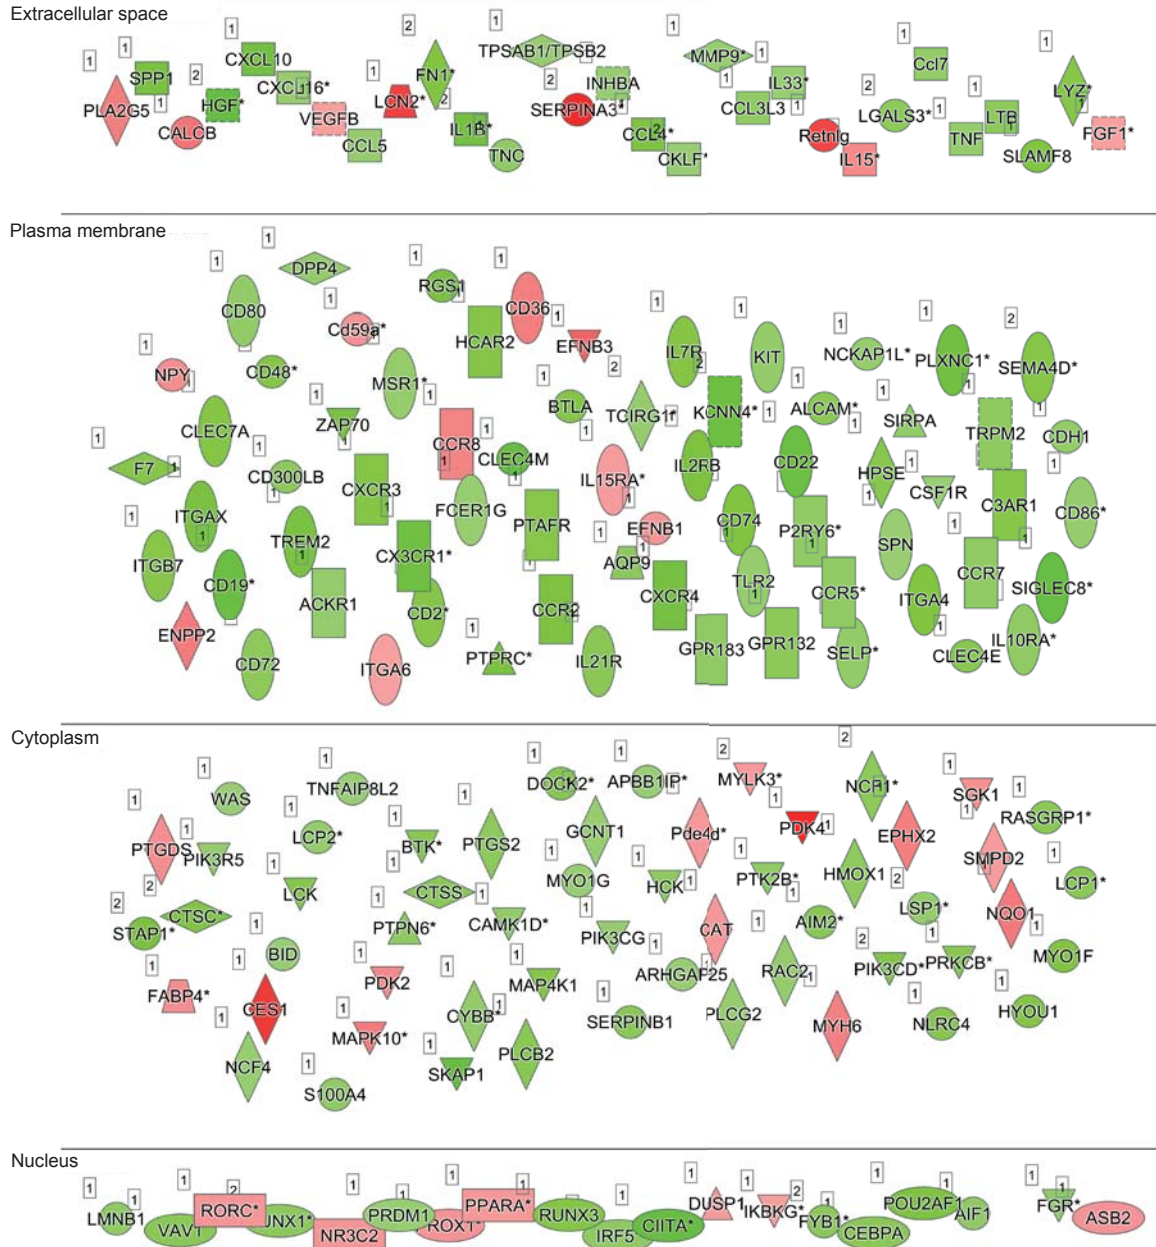

Figure S3B

Leukocyte migration day 2

Extracellular space

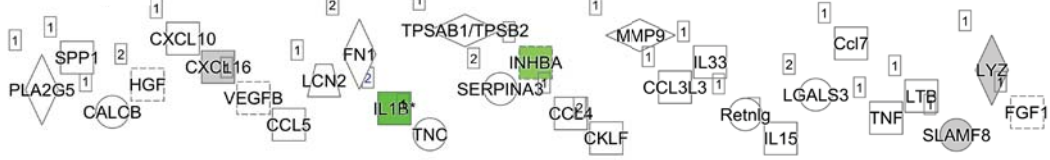

Plasma membrane

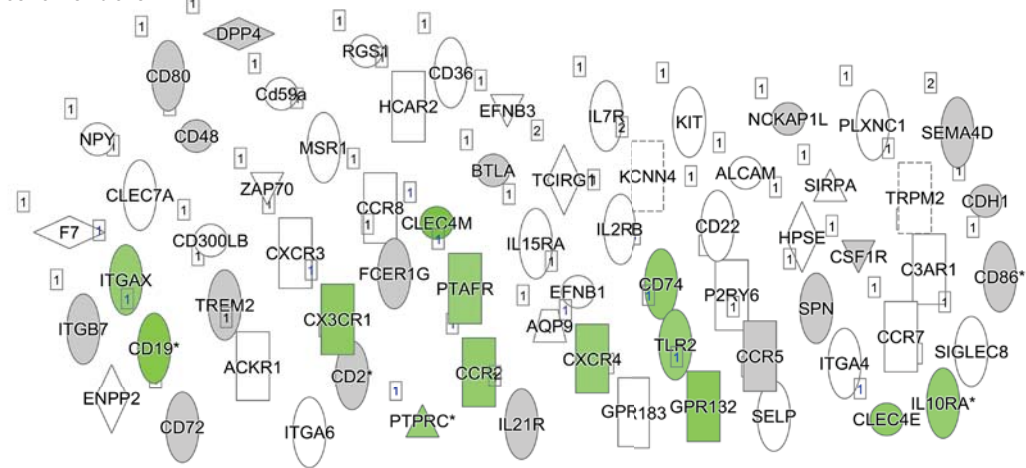

Cytoplasm

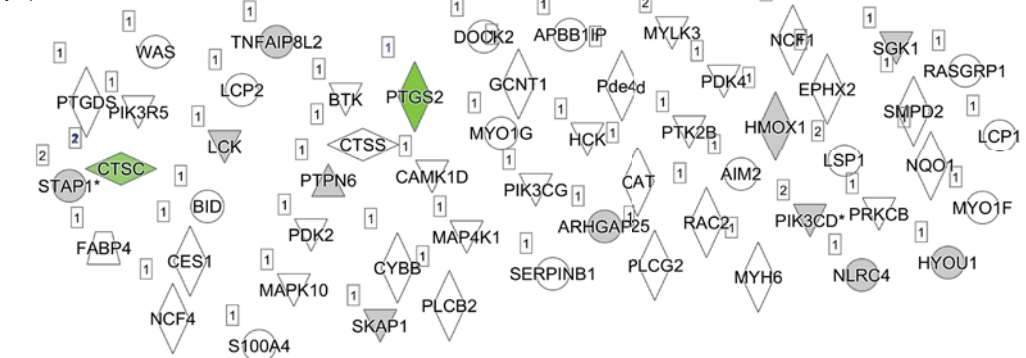

Nucleus

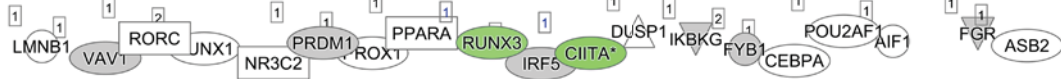

Figure S3C

Leukocyte migration day 7

Extracellular space

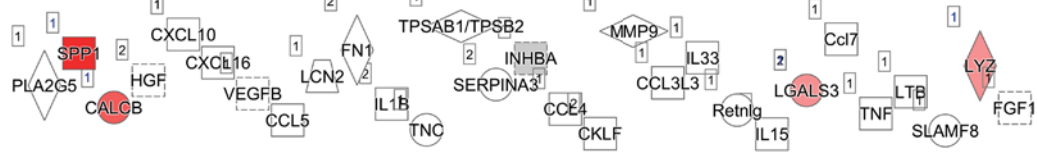

Plasma membrane

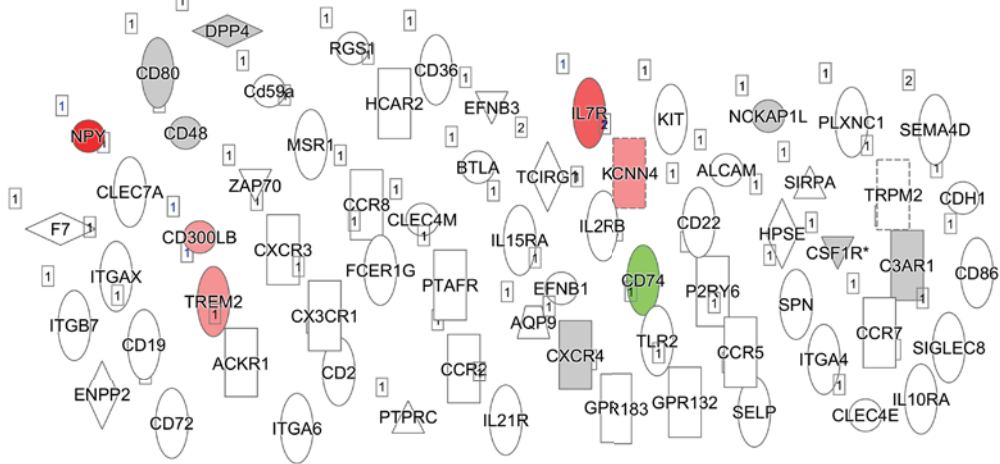

Cytoplasm

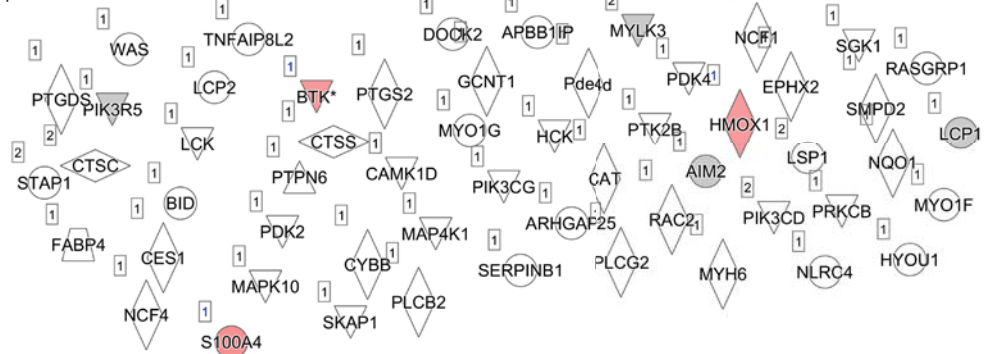

Nucleus

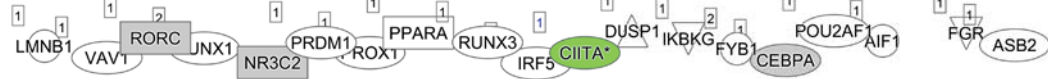

Figure S4

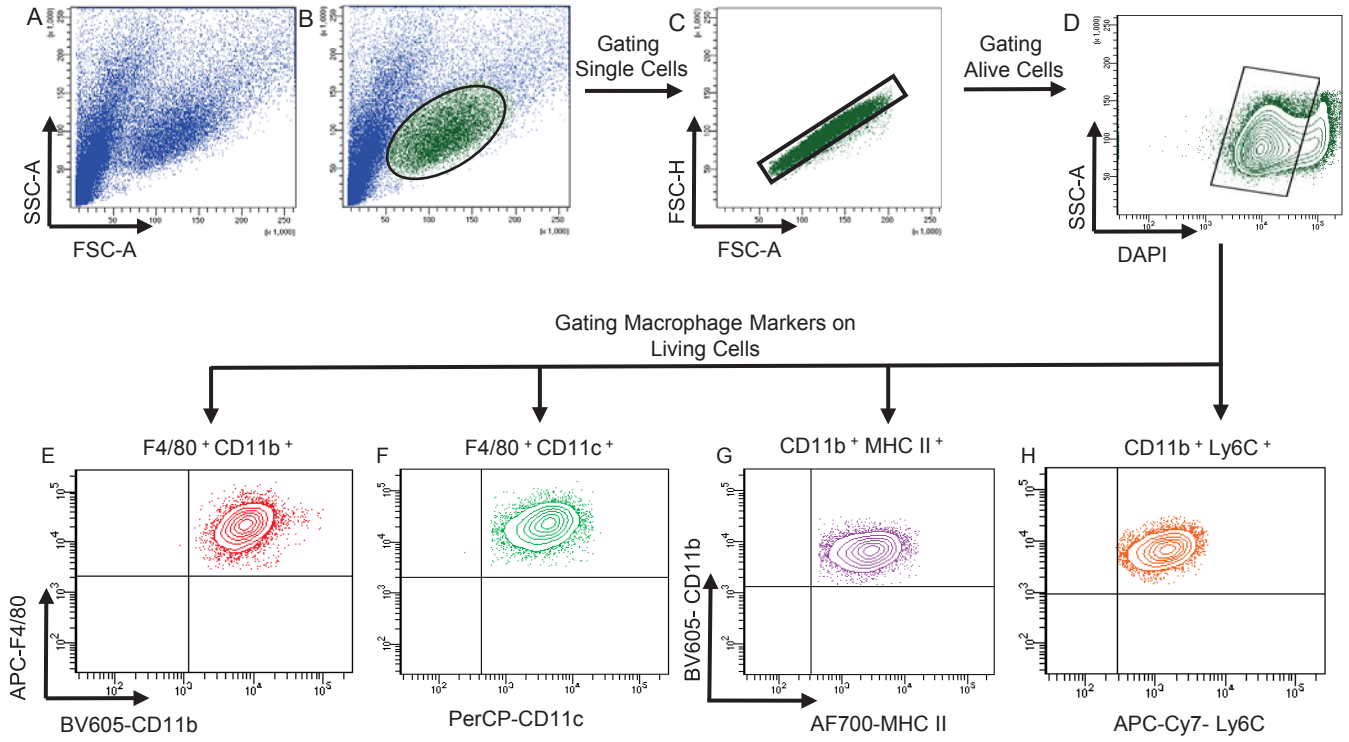

### **Supplemental figure legends**

#### **Figure S1 - IGF1 dose response curve**

Isolated hearts of mice were perfused for 10 min with indicated concentrations of IGF1.

A IGF1 treatment dose-dependently increases Akt phosphorylation (Ser 473) in isolated hearts of C57Bl/6J mice. Example western blot of phosphoAkt and panAkt.

B Summarized dose response curve of pAkt/panAkt (n = 3 hearts for each concentration).

Data information: Data are presented as mean  $\pm$  SD.

#### **Figure S2 - Heart cryosection protocol and scar staining**

C57Bl/6J mice were subjected to 45 min left anterior descending coronary artery occlusion and 1 week of reperfusion. At the start of reperfusion, mice were treated with IGF1 (IGF1) or vehicle (Con) over three days.

Hearts were harvested 1 week after myocardial infarction.

A-B For histological analysis, cryosections (4  $\mu$ m) were taken from short axis sectional planes (distance 300  $\mu$ m), and Masson trichrome staining was used to assess scar size.

C-D Summarized data of number of sectional planes (left) and sectional planes with scar (right) (n = 7-8 hearts for each group).

Data information: In (C-D), data are presented as mean  $\pm$  SD.

#### **Figure S3 - Microarray analysis of the infarct region on days 1, 2 and 7**

C57Bl/6J mice were subjected to 45 min left anterior descending coronary artery occlusion, followed by reperfusion. At the start of reperfusion, mice were treated with IGF1 over three days. Agilent microarray analysis of the infarct region was performed on days 1, 2 and 7 after MI. Genes altered in the leukocyte migration pathway (the pathway with the highest change in activity score) are shown on day 1 (Fig S3A), 2 (Fig S3B) and 7 (Fig S3C). Genes downregulated in IGF1 treated animals are shown in green, upregulated genes are shown in red.



**Figure S4 - Gating and cell identification using flow cytometer**

- A Forward and sideward scatter of all the events separated by size and granularity.
- B Gating for identification of macrophages separated by size and granularity
- C Pulse geometric gate (height and area occupied by cells) for identification of single cells.
- D Viability gate for living cells using DAPI.
- E-F Living cells positive for F4/80, CD11b and CD11c.
- G-H Living cells positive for CD11b, MHCII and Ly6C (low).

## Supplemental tables

**Table S1:** Echocardiographic data of C57Bl/6J mice

| <b>pre-OP</b> |            |                |             |                      |
|---------------|------------|----------------|-------------|----------------------|
|               | <b>Con</b> | <b>p-value</b> | <b>IGF1</b> | <b>p-value</b>       |
| CO (ml/min)   | 24.3±3.5   |                | 24.2±3.4    |                      |
| EDV (μl)      | 68.9±10.0  |                | 66.9±9.1    |                      |
| ESV (μl)      | 24.6±4.7   |                | 23.0±3.7    |                      |
| LVAW,d (mm)   | 0.88±0.04  |                | 0.78±0.05   |                      |
| LVAW,s (mm)   | 1.37±0.03  |                | 1.27±0.09   |                      |
| LVID,d (mm)   | 3.70±0.22  |                | 3.85±0.28   |                      |
| LVID,s (mm)   | 2.30±0.27  |                | 2.33±0.20   |                      |
| LVPW,d (mm)   | 0.74±0.05  |                | 0.80±0.16   |                      |
| LVPW,s (mm)   | 1.24±0.12  |                | 1.27±0.18   |                      |
| LV mass (mg)  | 84.7±6.6   |                | 86.4±10.3   |                      |
| <b>Week 1</b> |            |                |             |                      |
|               | <b>Con</b> | <b>p-value</b> | <b>IGF1</b> | <b>p-value</b>       |
| CO (ml/min)   | 14.9±2.8   | < 0.001 *      | 21.9±3.8    | 0.005 #              |
| EDV (μl)      | 79.7±8.7   |                | 72.7±9.7    |                      |
| ESV (μl)      | 53.2±8.4   | < 0.001 *      | 33.4±6.8    | 0.003 #              |
| LVAW,d (mm)   | 1.06±0.09  | 0.004 *        | 0.89±0.12   | 0.004 #              |
| LVAW,s (mm)   | 1.26±0.18  |                | 1.32±0.17   |                      |
| LVID,d (mm)   | 4.06±0.26  |                | 3.88±0.31   |                      |
| LVID,s (mm)   | 3.42±0.30  |                | 2.66±0.47   | 0.010 #              |
| LVPW,d (mm)   | 0.75±0.12  |                | 0.76±0.08   |                      |
| LVPW,s (mm)   | 0.93±0.16  | 0.016 *        | 1.16±0.13   | 0.041 #              |
| LV mass (mg)  | 117.5±25.8 | 0.016 *        | 93.0±14.7   | 0.013 *              |
| <b>Week 4</b> |            |                |             |                      |
|               | <b>Con</b> | <b>p-value</b> | <b>IGF1</b> | <b>p-value</b>       |
| CO (ml/min)   | 16.4±1.4   | 0.005 *        | 21.1±5.2    |                      |
| EDV (μl)      | 91.6±16.9  | 0.015 *        | 78.7±12.9   |                      |
| ESV (μl)      | 61.5±14.6  | < 0.001 *      | 41.2±13.5   | < 0.001 *<br>0.003 # |
| LVAW,d (mm)   | 0.85±0.09  |                | 0.97±0.09   | 0.003 *              |
| LVAW,s (mm)   | 1.08±0.26  |                | 1.40±0.16   |                      |
| LVID,d (mm)   | 4.46±0.41  | < 0.001 *      | 4.36±0.38   | 0.013 *              |
| LVID,s (mm)   | 3.58±0.60  | < 0.001 *      | 3.09±0.58   | 0.014 *              |
| LVPW,d (mm)   | 0.79±0.11  |                | 0.77±0.08   |                      |
| LVPW,s (mm)   | 1.10±0.23  |                | 1.20±0.20   |                      |
| LV mass (mg)  | 120.8±25.7 | 0.006 *        | 126.9±14.2  | 0.003 *              |

\* = vs. pre-OP; # = vs. Con

**Table S2: Regional wall motion analysis**

| <b>Figure 2C</b>   |              | <b>Displacement - radial</b> |               |                |
|--------------------|--------------|------------------------------|---------------|----------------|
| <b>Segment</b>     | <b>group</b> | <b>pre-OP</b>                | <b>week 1</b> | <b>p-value</b> |
| Lateral wall       | Con          | 0.45±0.09                    | 0.27±0.10     | 0.002 *        |
|                    | IGF1         | 0.41±0.07                    | 0.30±0.11     |                |
| Posterior wall     | Con          | 0.47±0.09                    | 0.30±0.12     | 0.010 *        |
|                    | IGF1         | 0.44±0.12                    | 0.30±0.11     | 0.035 *        |
| Inferior free wall | Con          | 0.58±0.08                    | 0.44±0.14     | 0.032 *        |
|                    | IGF1         | 0.52±0.07                    | 0.40±0.13     |                |
| Ant. septal wall   | Con          | 0.54±0.07                    | 0.46±0.14     |                |
|                    | IGF1         | 0.51±0.07                    | 0.50±0.15     |                |
| Average            | Con          | 0.49±0.06                    | 0.33±0.09     | < 0.001 *      |
|                    | IGF1         | 0.47±0.06                    | 0.36±0.08     | 0.019 *        |

  

| <b>Figure 2D</b>   |              | <b>Strain - radial</b> |               |                |
|--------------------|--------------|------------------------|---------------|----------------|
| <b>Segment</b>     | <b>group</b> | <b>pre-OP</b>          | <b>week 1</b> | <b>p-value</b> |
| Lateral wall       | Con          | 23.3±9.8               | 13.2±14.0     |                |
|                    | IGF1         | 23.6±6.5               | 16.2±8.2      |                |
| Posterior wall     | Con          | 26.9±10.0              | 13.7±8.8      | 0.024 *        |
|                    | IGF1         | 28.6±10.4              | 12.7±10.0     | 0.006 *        |
| Inferior free wall | Con          | 31.7±10.7              | 24.1±10.3     |                |
|                    | IGF1         | 30.5±9.6               | 23.0±12.9     |                |
| Ant. septal wall   | Con          | 29.2±7.0               | 25.5±7.9      |                |
|                    | IGF1         | 28.1±5.3               | 28.9±10.9     |                |
| Average            | Con          | 26.9±6.8               | 15.3±7.8      | 0.003 *        |
|                    | IGF1         | 25.3±4.0               | 18.2±6.1      |                |

  

| <b>Figure 2E</b>   |              | <b>Strain - circumferential</b> |               |                |
|--------------------|--------------|---------------------------------|---------------|----------------|
| <b>Segment</b>     | <b>group</b> | <b>pre-OP</b>                   | <b>week 1</b> | <b>p-value</b> |
| Lateral wall       | Con          | -22.3±7.7                       | -10.8±6.5     | 0.009 *        |
|                    | IGF1         | -22.0±3.9                       | -13.1±9.2     | 0.045 *        |
| Posterior wall     | Con          | -26.4±12.3                      | -15.4±11.0    |                |
|                    | IGF1         | -25.1±10.7                      | -13.9±4.1     |                |
| Inferior free wall | Con          | -28.7±5.6                       | -26.6±10.3    |                |
|                    | IGF1         | -23.7±7.7                       | -21.6±10.4    |                |
| Ant. septal wall   | Con          | -26.2±6.2                       | -21.4±9.1     |                |
|                    | IGF1         | -28.2±7.2                       | -23.7±9.3     |                |
| Average            | Con          | -25.6±3.4                       | -16.6±5.3     | 0.001 *        |
|                    | IGF1         | -24.6±2.7                       | -17.4±5.1     | 0.006 *        |

\* = vs. pre-OP

**Table S3:** Echocardiographic data of iCM-IG1RKO mice

| <b>pre-OP</b> |                 |                  |                 |                  |                                                                           |
|---------------|-----------------|------------------|-----------------|------------------|---------------------------------------------------------------------------|
|               | <b>WT - Con</b> | <b>WT - IGF1</b> | <b>KO - Con</b> | <b>KO - IGF1</b> | <b>p-value</b>                                                            |
| CO (ml/min)   | 31.2±3.9        | 28.3±4.8         | 28.8±4.8        | 29.6±1.9         |                                                                           |
| EDV (μl)      | 87.7±10.2       | 84.6±13.3        | 86.2±14.3       | 91.3±10.4        |                                                                           |
| ESV (μl)      | 34.8±5.9        | 34.1±6.2         | 35.2±9.4        | 38.4±5.1         |                                                                           |
| LVAW,d (mm)   | 0.81±0.11       | 1.06±0.15        | 0.91±0.09       | 0.96±0.11        |                                                                           |
| LVAW,s (mm)   | 1.24±0.12       | 1.54±0.15        | 1.35±0.05       | 1.38±0.15        |                                                                           |
| LVID,d (mm)   | 4.30±0.16       | 4.08±0.37        | 4.12±0.27       | 4.19±0.30        |                                                                           |
| LVID,s (mm)   | 2.97±0.20       | 2.54±0.50        | 2.74±0.37       | 2.74±0.29        |                                                                           |
| LVPW,d (mm)   | 0.77±0.05       | 0.84±0.09        | 0.73±0.07       | 0.72±0.12        |                                                                           |
| LVPW,s (mm)   | 1.25±0.09       | 1.33±0.14        | 1.19±0.14       | 1.25±0.13        |                                                                           |
| LV mass (mg)  | 106.1±8.8       | 108.8±12.9       | 101.7±16.2      | 110.8±19.3       |                                                                           |
| <b>Week 1</b> |                 |                  |                 |                  |                                                                           |
|               | <b>WT - Con</b> | <b>WT - IGF1</b> | <b>KO - Con</b> | <b>KO - IGF1</b> | <b>p-value</b>                                                            |
| CO (ml/min)   | 19.9±6.5 *      | 23.7±5.1         | 20.9±2.8        | 22.3±3.9         | WT-Con: < 0.001 *<br>KO-Con: 0.002 *<br>KO-IGF1: 0.009 *                  |
| EDV (μl)      | 89.7±28.8       | 85.9±7.5         | 100.9±5.7       | 73.0±8.9         |                                                                           |
| ESV (μl)      | 53.0±16.4       | 42.4±6.6         | 61.5±9.3        | 32.4±2.4         | WT-Con: 0.022 *<br>KO-Con: < 0.001 *<br>KO-IGF1: 0.006 #                  |
| LVAW,d (mm)   | 0.93±0.15       | 1.03±0.13        | 0.88±0.14       | 0.93±0.03        |                                                                           |
| LVAW,s (mm)   | 1.37±0.23       | 1.40±0.14        | 1.15±0.26       | 1.32±0.09        |                                                                           |
| LVID,d (mm)   | 4.48±0.41       | 3.95±0.33        | 4.68±0.28       | 3.72±0.27        | KO-Con: 0.015 *<br>KO-IGF1: < 0.001 #                                     |
| LVID,s (mm)   | 3.33±0.52       | 2.72±0.46        | 3.64±0.49       | 2.46±0.25        | KO-Con: 0.002 *<br>KO-IGF1: 0.001 #                                       |
| LVPW,d (mm)   | 0.78±0.15       | 0.91±0.13        | 0.77±0.14       | 0.71±0.09        |                                                                           |
| LVPW,s (mm)   | 1.06±0.18       | 1.34±0.16        | 1.09±0.17       | 1.17±0.11        | WT-Con: 0.041 *<br>WT-IGF1: 0.016 #                                       |
| LV mass (mg)  | 128.9±24.9      | 126.4±28.4       | 130.7±26.1      | 87.7±5.8         | KO-Con: 0.047 *<br>KO-IGF1: 0.021 #                                       |
| <b>Week 4</b> |                 |                  |                 |                  |                                                                           |
|               | <b>WT - Con</b> | <b>WT - IGF1</b> | <b>KO - Con</b> | <b>KO - IGF1</b> | <b>p-value</b>                                                            |
| CO (ml/min)   | 17.5±2.4 *      | 23.4±2.5         | 20.9±3.5        | 21.1±3.4         | WT-Con: 0.001 *<br>WT-IGF1: 0.040 *<br>KO-Con: 0.002 *<br>KO-IGF1: 0.003* |
| EDV (μl)      | 94.9±34.1       | 84.1±9.9         | 116.4±17.3      | 82.9±10.1        | KO-Con: < 0.001 *                                                         |
| ESV (μl)      | 61.7±31.6       | 41.7±8.1         | 76.2±15.0       | 42.9±7.4         | WT-Con: 0.003 *<br>KO-Con: < 0.001 *<br>KO-IGF1: 0.001 #                  |
| LVAW,d (mm)   | 0.90±0.14       | 1.08±0.22        | 0.86±0.17       | 0.99±0.10        |                                                                           |
| LVAW,s (mm)   | 1.21±0.17       | 1.46±0.26        | 1.09±0.28       | 1.35±0.06        |                                                                           |
| LVID,d (mm)   | 4.43±0.54       | 4.16±0.34        | 4.84±0.25       | 4.13±0.32        | KO-Con: 0.002 *<br>KO-IGF1: 0.011 #                                       |
| LVID,s (mm)   | 3.39±0.68       | 2.94±0.43        | 3.87±0.45       | 3.02±0.28        | KO-Con: < 0.001 *<br>KO-IGF1: 0.024 #                                     |
| LVPW,d (mm)   | 0.79±0.11       | 0.85±0.07        | 0.74±0.17       | 0.80±0.13        |                                                                           |
| LVPW,s (mm)   | 1.11±0.15       | 1.20±0.09        | 1.01±0.21       | 1.16±0.09        |                                                                           |
| LV mass (mg)  | 125.6±34.8      | 125.7±21.5       | 124.4±27.0      | 116.0±5.8        |                                                                           |

\* = vs. pre-OP; # = vs. Con

**Table S4:** Echocardiographic data of My-IG1RKO mice

| <b>pre-OP</b> |                 |                  |                 |                  |                                                             |
|---------------|-----------------|------------------|-----------------|------------------|-------------------------------------------------------------|
|               | <b>WT - Con</b> | <b>WT - IGF1</b> | <b>KO - Con</b> | <b>KO - IGF1</b> | <b>p-value</b>                                              |
| CO (ml/min)   | 25.9±6.7        | 23.5±5.7         | 20.2±5.3        | 24.7±6.4         |                                                             |
| EDV (μl)      | 79.2±17.3       | 71.1±14.7        | 66.0±15.0       | 77.7±18.0        |                                                             |
| ESV (μl)      | 31.8±39.8       | 27.5±6.0         | 26.3±7.0        | 31.6±9.3         |                                                             |
| LVAW,d (mm)   | 0.91±0.05       | 0.82±0.07        | 0.83±0.07       | 0.88±0.07        |                                                             |
| LVAW,s (mm)   | 1.31±0.16       | 1.24±0.05        | 1.26±0.15       | 1.24±0.06        |                                                             |
| LVID,d (mm)   | 3.82±0.39       | 3.85±0.29        | 3.71±0.35       | 3.94±0.57        |                                                             |
| LVID,s (mm)   | 2.48±0.41       | 2.54±0.35        | 2.46±0.38       | 2.76±0.86        |                                                             |
| LVPW,d (mm)   | 0.82±0.08       | 0.75±0.03        | 0.81±0.08       | 0.76±0.09        |                                                             |
| LVPW,s (mm)   | 1.22±0.05       | 1.19±0.15        | 1.13±0.11       | 1.14±0.18        |                                                             |
| LV mass (mg)  | 93.1±17.2       | 86.8±13.7        | 84.7±17.6       | 90.2±15.8        |                                                             |
| <b>Week 1</b> |                 |                  |                 |                  |                                                             |
|               | <b>WT - Con</b> | <b>WT - IGF1</b> | <b>KO - Con</b> | <b>KO - IGF1</b> | <b>p-value</b>                                              |
| CO (ml/min)   | 14.4±3.6        | 22.5±5.5         | 15.4±4.5        | 16.7±4.9         | WT-Con: < 0.001 *<br>KO-Con: 0.042 *<br>KO-IGF1: < 0.001 *  |
| EDV (μl)      | 70.8±17.3       | 81.1±17.1        | 75.3±16.0       | 89.9±38.1        |                                                             |
| ESV (μl)      | 44.1±12.0       | 41.9±8.6         | 46.1±8.7        | 59.2±30.9        | WT-IGF1: 0.025 *<br>KO-Con: < 0.001 *<br>KO-IGF1: < 0.001 * |
| LVAW,d (mm)   | 1.05±0.14       | 0.97±0.10        | 0.89±0.11       | 1.01±0.11        | WT-Con: 0.045 *<br>WT-IGF1: 0.023 *<br>KO-IGF1: 0.043 *     |
| LVAW,s (mm)   | 1.36±0.19       | 1.29±0.11        | 1.24±0.13       | 1.25±0.13        |                                                             |
| LVID,d (mm)   | 3.82±0.60       | 4.05±0.49        | 4.09±0.50       | 4.09±0.68        | KO-Con: 0.041 *                                             |
| LVID,s (mm)   | 2.80±0.56       | 2.97±0.61        | 3.08±0.62       | 3.28±0.89        | KO-Con: 0.007 *<br>KO-IGF1: 0.024 *                         |
| LVPW,d (mm)   | 0.83±0.07       | 0.82±0.08        | 0.78±0.10       | 0.79±0.11        |                                                             |
| LVPW,s (mm)   | 1.09±0.14       | 1.15±0.09        | 1.06±0.16       | 1.03±0.15        |                                                             |
| LV mass (mg)  | 108.2±26.1      | 113.3±24.8       | 108.6±36.6      | 124.4±37.6       | WT-IGF1: 0.036 *<br>KO-Con: 0.042 *<br>KO-IGF1: 0.003 *     |

continued

continuation **Table S4**

| <b>Week 4</b> |                 |                  |                 |                  |                                                                               |
|---------------|-----------------|------------------|-----------------|------------------|-------------------------------------------------------------------------------|
|               | <b>WT - Con</b> | <b>WT - IGF1</b> | <b>KO - Con</b> | <b>KO - IGF1</b> | <b>p-value</b>                                                                |
| CO (ml/min)   | 14.7±3.3        | 22.8±4.2         | 14.5±2.7        | 18.8±5.5         | WT-Con: < 0.001 *<br>KO-Con: 0.014 *<br>KO-IGF1: 0.018 *                      |
| EDV (μl)      | 79.8±11.3       | 88.6±16.0        | 73.7±16.2       | 95.8±33.1        | WT-IGF1: 0.018 *<br>KO-IGF1: 0.002 *                                          |
| ESV (μl)      | 51.2±7.3        | 47.5±7.8         | 46.1±14.6       | 63.1±28.4        | WT-Con: 0.002 *<br>WT-IGF1: 0.002*<br>KO-Con: < 0.001 *<br>KO-IGF1: < 0.001 * |
| LVAW,d (mm)   | 0.92±0.06       | 0.92±0.09        | 0.93±0.07       | 1.04±0.14        | KO-IGF1: 0.030 *                                                              |
| LVAW,s (mm)   | 1.12±0.11       | 1.22±0.14        | 1.17±0.15       | 1.29±0.17        |                                                                               |
| LVID,d (mm)   | 4.25±0.33       | 4.30±0.33        | 4.06±0.53       | 4.26±0.63        | WT-Con: 0.029 *<br>WT-IGF1: 0.020*                                            |
| LVID,s (mm)   | 3.32±0.36       | 3.26±0.32        | 3.16±0.66       | 3.34±0.94        | WT-Con: < 0.001 *<br>WT-IGF1: 0.003 *<br>KO-Con: 0.002 *<br>KO-IGF1: 0.005 *  |
| LVPW,d (mm)   | 0.83±0.07       | 0.82±0.06        | 0.85±0.12       | 0.97±0.17        | KO-IGF1: 0.002 *                                                              |
| LVPW,s (mm)   | 1.08±0.06       | 1.20±0.10        | 1.16±0.07       | 1.27±0.22        |                                                                               |
| LV mass (mg)  | 112.3±10.6      | 120.9±15.4       | 116.0±40.8      | 143.3±30.2       | WT-IGF1: 0.006 *<br>KO-Con: 0.006 *<br>KO-IGF1: < 0.001 *                     |

\* p<0.05 vs pre-OP, # p<0.05 vs WT-Con, § p<0.05 vs WT-IGF1

**Table S5:** P-values from statistical tests (Fig. 1-6).

| <b>Figure</b>  | <b>parameter</b>         | <b>week 1</b>         | <b>p-value</b>                           | <b>week 4</b>                         | <b>p-value</b>                           |
|----------------|--------------------------|-----------------------|------------------------------------------|---------------------------------------|------------------------------------------|
| <b>Fig. 1C</b> | <b>EF</b>                | Con                   | < 0.001 (vs. pre-OP)                     | Con                                   | < 0.001 (vs. pre-OP)                     |
|                |                          | IGF1                  | 0.009 (vs. pre-OP)<br>< 0.001 (vs. Con)  | IGF1                                  | < 0.001 (vs. pre-OP)<br>0.006 (vs. Con)  |
| <b>Fig. 1D</b> | <b>FAC</b>               | Con                   | < 0.001 (vs. pre-OP)                     | Con                                   | < 0.001 (vs. pre-OP)                     |
|                |                          | IGF1                  | 0.016 (vs. pre-OP)<br>< 0.001 (vs. Con)  | IGF1                                  | 0.012 (vs. pre-OP)<br>0.002 (vs. Con)    |
| <b>Fig. 1E</b> | <b>SV</b>                | Con                   | < 0.001 (vs. pre-OP)                     | Con                                   | < 0.001 (vs. pre-OP)                     |
|                |                          | IGF1                  | 0.009 (vs. Con)                          |                                       |                                          |
| <b>Fig. 2A</b> | <b>EF</b>                | Con                   | < 0.001 (vs. pre-OP)                     |                                       |                                          |
|                |                          | IGF1                  | 0.005 (vs. pre-OP)<br>< 0.001 (vs. Con)  |                                       |                                          |
| <b>Fig. 2C</b> | <b>Displ.- radial</b>    | <b>Ant. free wall</b> | Con                                      | < 0.001 (vs. pre-OP)                  |                                          |
|                |                          |                       | IGF1                                     | 0.006 (vs. pre-OP)<br>0.006 (vs. Con) |                                          |
| <b>Fig. 2D</b> | <b>Strain - radial</b>   | <b>Ant. free wall</b> | Con                                      | < 0.001 (vs. pre-OP)                  |                                          |
|                |                          |                       | IGF1                                     | 0.005 (vs. pre-OP)<br>0.041 (vs. Con) |                                          |
| <b>Fig. 2E</b> | <b>Strain - circumf.</b> | <b>Ant. free wall</b> | Con                                      | < 0.001 (vs. pre-OP)                  |                                          |
|                |                          |                       | IGF1                                     | 0.006 (vs. Con)                       |                                          |
| <b>Fig. 2F</b> | <b>Scar size</b>         |                       | 0.03 (vs. Con)                           |                                       |                                          |
| <b>Fig. 2H</b> | <b>Capillary density</b> | <b>Borderzone</b>     | 0.003 (vs. Con)                          |                                       |                                          |
|                |                          | <b>Scar area</b>      | 0.037 (vs. Con)                          |                                       |                                          |
| <b>Fig. 3B</b> | <b>EF</b>                | WT-Con                | < 0.001 (vs. pre-OP)                     | WT-Con                                | < 0.001 (vs. pre-OP)                     |
|                |                          | WT-IGF1               | 0.028 (vs. pre-OP)<br>0.041 (vs. WT-Con) | WT-IGF1                               | 0.034 (vs. pre-OP)<br>0.013 (vs. WT-Con) |
|                |                          | KO-Con                | < 0.001 (vs. pre-OP)                     | KO-Con                                | < 0.001 (vs. pre-OP)                     |
|                |                          | KO-IGF1               | < 0.001 (vs. KO-Con)                     | KO-IGF1                               | 0.05 (vs. pre-OP)<br>0.003 (vs. KO-Con)  |
| <b>Fig. 3C</b> | <b>FAC</b>               | WT-Con                | < 0.001 (vs. pre-OP)                     | WT-Con                                | < 0.001 (vs. pre-OP)                     |
|                |                          | WT-IGF1               | 0.026 (vs. WT-Con)                       | WT-IGF1                               | 0.036 (vs. WT-Con)                       |
|                |                          | KO-Con                | < 0.001 (vs. pre-OP)                     | KO-Con                                | < 0.001 (vs. pre-OP)                     |
|                |                          | KO-IGF1               | < 0.001 (vs. KO-Con)                     |                                       |                                          |
| <b>Fig. 3D</b> | <b>SV</b>                | WT-Con                | < 0.001 (vs. pre-OP)                     | WT-Con                                | < 0.001 (vs. pre-OP)                     |
|                |                          | KO-Con                | 0.015 (vs. pre-OP)                       | KO-Con                                | 0.025 (vs. pre-OP)                       |
|                |                          | KO-IGF1               | 0.019 (vs. pre-OP)                       | KO-IGF1                               | 0.013 (vs. pre-OP)                       |

continued

continuation **Table S5**

|                |                                | <u>week 1</u>   | <u>p-value</u>                                | <u>week 4</u> | <u>p-value</u>                              |
|----------------|--------------------------------|-----------------|-----------------------------------------------|---------------|---------------------------------------------|
| <b>Fig. 4D</b> | <b>EF</b>                      | WT-Con          | < 0.001 (vs. pre-OP)                          | WT-Con        | < 0.001 (vs. pre-OP)                        |
|                |                                | WT-IGF1         | < 0.001 (vs. pre-OP)<br>0.012 (vs. WT-Con)    | WT-IGF1       | < 0.001 (vs. pre-OP)<br>0.009 (vs. WT-Con)  |
|                |                                | KO-Con          | < 0.001 (vs. pre-OP)                          | KO-Con        | < 0.001 (vs. pre-OP)                        |
|                |                                | KO-IGF1         | < 0.001 (vs. pre-OP)<br>0.002 (vs. WT-IGF1)   | KO-IGF1       | < 0.001 (vs. pre-OP)<br>0.005 (vs. WT-IGF1) |
| <b>Fig. 4E</b> | <b>FAC</b>                     | WT-Con          | < 0.001 (vs. pre-OP)                          | WT-Con        | < 0.001 (vs. pre-OP)                        |
|                |                                | WT-IGF1         | 0.001 (vs. pre-OP)<br>0.016 (vs. WT-Con)      | WT-IGF1       | < 0.001 (vs. pre-OP)<br>0.007 (vs. WT-Con)  |
|                |                                | KO-Con          | < 0.001 (vs. pre-OP)                          | KO-Con        | < 0.001 (vs. pre-OP)                        |
|                |                                | KO-IGF1         | < 0.001 (vs. pre-OP)<br>< 0.001 (vs. WT-IGF1) | KO-IGF1       | < 0.001 (vs. pre-OP)                        |
| <b>Fig. 4F</b> | <b>SV</b>                      | WT-Con          | < 0.001 (vs. pre-OP)                          | WT-Con        | < 0.001 (vs. pre-OP)                        |
|                |                                | KO-Con          | 0.008 (vs. pre-OP)                            | KO-Con        | 0.002 (vs. pre-OP)                          |
|                |                                | KO-IGF1         | < 0.001 (vs. pre-OP)                          | KO-IGF1       | 0.001 (vs. pre-OP)                          |
| <b>Fig. 5D</b> | <b>CD206</b>                   | IGF1 (10 ng/ml) | 0.018 (vs. untreated)                         |               |                                             |
|                |                                | IGF1 (20 ng/ml) | 0.024 (vs. untreated)                         |               |                                             |
| <b>Fig. 5E</b> | <b>TNF-<math>\alpha</math></b> | M0+IGF1         | 0.028 (vs. M0)                                |               |                                             |
|                | <b>MRC1</b>                    | M0+IGF          | 0.035 (vs. M0)                                |               |                                             |
|                | <b>IGF1</b>                    | M0+IGF1         | 0.002 (vs. M0)                                |               |                                             |
| <b>Fig. 6B</b> | <b>CD206<sup>+</sup></b>       | IGF1            | 0.041 (vs. control)                           |               |                                             |

All P-values are rounded to three decimals. EF = ejection fraction, FAC = fraction area change, SV = stroke volume.



**Table S6:** Primer sequences

| <b>Gene</b>                                              | <b>Primer sequence</b>                                                        |
|----------------------------------------------------------|-------------------------------------------------------------------------------|
| <b>Tumor Necrosis Factor Alpha</b>                       | forward: GCCTCTTCTCATTCCCTGCTTG<br>reverse: CTGATGAGAGGGAGGCCATT              |
| <b>Interleukin 12A</b>                                   | forward: TACTAGAGAGACTTCTCCACAACAAGAG<br>reverse: TCTGGTACATCTTCAAGTCCTCATAGA |
| <b>iNOS</b>                                              | forward: CATCAACCAGTATTATGGCTC<br>reverse: TTCCTTTGTTACAGCTTCC                |
| <b>Macrophage mannose receptor 1</b>                     | forward: CTCTGTTTCAGCTATTGGACGC<br>reverse: CGGAATTTCTGGGATTTCAGCTTC          |
| <b>Arginase 1</b>                                        | forward: CTCCAAGCCAAAGTCCTTAGAG<br>reverse: AGGAGCTGTCATTAGGGACATC            |
| <b>Resistin-like alpha</b>                               | forward: TCACAGGTCTGGCAATTCTTCTG<br>reverse: TTTGTCCTTAGGAGGGCTTCCTCG         |
| <b>Insulin like growth factor 1</b>                      | forward: CTGGACCAGAGACCTTTGC<br>reverse: GGACGGGGACTTCTGAGTCTT                |
| <b>Vascular Endothelial Growth Factor</b>                | forward: GCACATAGAGAGAATGAGCTTCC<br>reverse: CTCCGCTCTGAACAAGGCT              |
| <b>Endoplasmic reticulum membrane protein complex 10</b> | forward: GTCCCCTAAACAGCCACTCT<br>reverse: CTCCTCCCAGAGTTCGGAAG                |
| <b>beta-Actin</b>                                        | forward: GATGTATGAAGCTTTGGTC<br>reverse: TGTGCACTTTTATTGGTCTC                 |
| <b>Nuclear distribution C</b>                            | forward: AGAACTCCAAGCTATCAGAC<br>reverse: CTCAGGATTTCCIGTTTCTTC               |
| <b>My-IGF1RKO</b>                                        | forward: TTCACCAGTACCATGGGCTCC<br>reverse: CTCAGCTTTGCAGGTGCACG               |
